# Supplementary material for: Transcriptome Analysis of Co-Cultures of THP-1 Human Macrophages with Inactivated Germinated Trichophyton rubrum Conidia
Source: MDPI journal article supplement (doi:10.3390/jof9050563), 2023-05-12
Supplement: s1 [file s1]

**Supplementary Table S1.** Primers used for qPCR analysis.

| <b>ID</b>                        | <b>Gene Product Name</b>                                                       | <b>Primer sequence (5'- 3')</b>                       | <b>Fragment</b> | <b>Reference</b> |
|----------------------------------|--------------------------------------------------------------------------------|-------------------------------------------------------|-----------------|------------------|
| <b>CRLF2</b><br>NM_001012288.2   | cytokine receptor like factor 2                                                | F: TGAGATTTTCGTGGCATCAG<br>R: TTCTATGGTGACGTTGCAGG    | 147 bp          | This paper       |
| <b>MMP10</b><br>NM_002425.3      | matrix metalloproteinase 10                                                    | F:GGAGTTGAGCCTAAGGTTGATG<br>R: TCGCCTAGCAATGTAACCAG   | 145 bp          | This paper       |
| <b>ANKRD1</b><br>NM_014391.2     | ankyrin repeat domain 1                                                        | F:GGTGAGACTGAACCGCTATAAG<br>R: GGCTGTCGAATATTGCTTTGG  | 140 bp          | This paper       |
| <b>CCL24</b><br>NM_002991.2      | C-C motif chemokine ligand 24                                                  | F: TTCTGTTCTTGGTGTCTGTG<br>R: CACTCGGTTCTCAGGAATTCTC  | 109 bp          | This paper       |
| <b>SLC43A2</b><br>NM_001284498.1 | solute carrier family 43 member 2                                              | F: GGGCTTTTACTCCTACCTGTG<br>R: AATTTAGCATCTCGTCCTGGG  | 140 bp          | This paper       |
| <b>CSF1</b><br>NM_000757.6       | colony stimulating factor 1                                                    | F: CGCTTCAGAGATAACACCCC<br>R: TCATAGAAAGTTCGGACGCAG   | 128 bp          | This paper       |
| <b>CXCL1</b><br>NM_001511.3      | chemokine (C-X-C motif) ligand 1 (melanoma growth stimulating activity, alpha) | F: AACCGAAGTCATAGCCACAC<br>R: GTTGGATTTGTCACTGTTTCAGC | 109 bp          | This paper       |
| <b>CXCL2</b><br>NM_002089.4      | chemokine (C-X-C motif) ligand 2                                               | F: AACCGAAGTCATAGCCACAC<br>R: TCTGGTCAGTTGGATTGCCC    | 116 bp          | This paper       |
| <b>CXCL3</b><br>NM_002090.2      | chemokine (C-X-C motif) ligand 3                                               | F: AACCGAAGTCATAGCCACAC<br>R: GTGCTCCCCCTTGTTTCAGTATC | 105 bp          | This paper       |
| <b>CXCL8</b>                     | chemokine (C-X-C motif) ligand 8                                               | F: TCCTGATTTCTGCAGCTCTG                               | 138 bp          | This paper       |

|                                |                                                  |                                                        |        |                                      |
|--------------------------------|--------------------------------------------------|--------------------------------------------------------|--------|--------------------------------------|
| NM_000584.4                    |                                                  | R: GTCCACTCTCAATCACTCTCAG                              |        |                                      |
| <b>IL-32</b><br>NM_001012631.2 | interleukin 32                                   | F: AAACCTGCTTATACTCCCTGG<br>R:CTTTATACATCACCCAGTCTCAGG | 138 bp | This paper                           |
| <b>S1PR1</b><br>NM_001400.4    | sphingosine-1-phosphate<br>receptor 1            | F:GGGAAGGGAGTATGTTTGTGG<br>R:AGGAAGAGGCGGAAGTTATTG     | 127 bp | This paper                           |
| <b>TLR8</b><br>NM_016610.3     | Member of the Toll-like<br>receptor family (TLR) | F: TGGTTCCTGTGAGTTATGCCG<br>R: CACATATTTGCCCACCGTTTG   | 139 bp | This paper                           |
| <b>TLR7</b><br>NM_016562.4     | toll-like receptor 7                             | F: TTCCTAAAACTCTGCCCTGTG<br>R: TGTGGTTAATGGTGAGGGTG    | 141 bp | This paper                           |
| <b>CD1D</b><br>NM_001766.3     | CD1d molecule                                    | F: TCATTGTGGGCTTTACCTCC<br>R: TTCAATTCCTGAGCAGACCAG    | 148 bp | This paper                           |
| <b>FCGBP</b><br>NM_003890.2    | Fc fragment of IgG binding<br>protein            | F:GTGACGTTGACTCCAAACAAG<br>R: ACGGACACAGATGCTAACTTC    | 83 bp  | This paper                           |
| <b>ACTB</b>                    | Beta-actin                                       | F:GTTGCGTTACACCCTTTCTTG<br>R:TGCTGTCACCTTCACCGTTC      | 154 bp | (DAI, Z. J. <i>et al.</i> ,<br>2012) |
| <b>GAPDH</b>                   | Glyceraldehyde-3-<br>phosphate dehydrogenase     | F:AATCCCATCACCATCTTCCAG<br>R:GAGCCCCAGCCTTCTCCAT       | 118 bp | (MA <i>et al.</i> , 2015)            |

**Supplementary Table S2.** General features of RNA-seq reads mapped to the human reference genome (hg38).

| Sample                  | Raw reads   | High-quality reads | Mapped reads<br>STAR | Total mapped reads (%) |
|-------------------------|-------------|--------------------|----------------------|------------------------|
| THP1-7 (Control1)       | 92,503,239  | 88,111,148         | 83,912,255           | 95.23                  |
| THP1-8 (Control2)       | 93,650,266  | 88,951,289         | 84,891,979           | 95.44                  |
| THP1-9 (Control3)       | 102,973,651 | 98,294,201         | 93,696,535           | 95.32                  |
| Co-THP1-10 (Treatment1) | 93,481,073  | 89,058,976         | 83,691,093           | 93.97                  |
| Co-THP1-11 (Treatment2) | 95,946,772  | 91,427,461         | 86,957,411           | 95.11                  |
| Co-THP1-12 (Treatment3) | 98,841,212  | 93,565,192         | 88,590,607           | 94.68                  |

**Supplementary Table S3.** RNA-seq genes from the co-culture of THP-1 macrophages with *T.rubrum* CGI.

( $P < 0.05$ ) up regulated  $\rightarrow \log_2$  (Fold Change)  $\geq 1.0$  and down-regulated  $\rightarrow \log_2$  (Fold Change)  $\leq -1.0$ .

DEGs = 83 genes

| Co-THP1 vs. THP1 |                |                                                                          |
|------------------|----------------|--------------------------------------------------------------------------|
| ID               | Log2FoldChange | Gene Product Name                                                        |
| CRLF2            | 2.79           | cytokine receptor like factor 2                                          |
| GREM1            | 2.75           | gremlin 1, DAN family BMP antagonist                                     |
| EBF1             | 2.59           | EBF transcription factor 1                                               |
| MMP10            | 2.41           | matrix metalloproteinase 10                                              |
| ANKRD1           | 2.21           | ankyrin repeat domain 1                                                  |
| LIF              | 2.14           | LIF interleukin 6 family cytokine                                        |
| HIVP2            | 2.12           | human immunodeficiency virus type I enhancer binding protein 2           |
| CCL24            | 1.92           | C-C motif chemokine ligand 24                                            |
| SLC43A2          | 1.92           | solute carrier family 43 member 2                                        |
| CSF1             | 1.90           | colony stimulating factor 1                                              |
| CXCL3            | 1.88           | C-X-C motif chemokine ligand 3                                           |
| TFPI2            | 1.88           | tissue factor pathway inhibitor 2                                        |
| GRASP            | 1.86           | general receptor for phosphoinositides 1 associated scaffold protein     |
| NR4A3            | 1.81           | nuclear receptor subfamily 4 group A member 3                            |
| ATP1B4           | 1.78           | ATPase Na <sup>+</sup> /K <sup>+</sup> transporting family member beta 4 |

|           |      |                                                             |
|-----------|------|-------------------------------------------------------------|
| PRSS22    | 1.77 | serine protease 22                                          |
| COL12A1   | 1.75 | collagen type XII alpha 1 chain                             |
| CXCL1     | 1.72 | C-X-C motif chemokine ligand 1                              |
| CXCL8     | 1.71 | C-X-C motif chemokine ligand 8                              |
| MGLL      | 1.68 | monoglyceride lipase                                        |
| MGAM      | 1.67 | maltase-glucoamylase                                        |
| IFI44L    | 1.57 | interferon induced protein 44 like                          |
| FMN1      | 1.51 | formin 1                                                    |
| BAALC-AS2 | 1.49 | BAALC antisense RNA 2                                       |
| TMEM119   | 1.43 | transmembrane protein 119                                   |
| FAM216B   | 1.41 | family with sequence similarity 216 member B                |
| SLC28A3   | 1.40 | solute carrier family 28 member 3                           |
| NRG1      | 1.37 | neuregulin 1                                                |
| P3H2      | 1.37 | prolyl 3-hydroxylase 2                                      |
| SCG5      | 1.36 | secretogranin V                                             |
| CLEC5A    | 1.36 | C-type lectin domain containing 5A                          |
| TNFAIP6   | 1.35 | TNF alpha induced protein 6                                 |
| MMP8      | 1.35 | matrix metalloproteinase 8                                  |
| BIRC3     | 1.33 | baculoviral IAP repeat containing 3                         |
| TNFRSF18  | 1.30 | TNF receptor superfamily member 18                          |
| MME       | 1.30 | membrane metalloendopeptidase                               |
| SERPINE1  | 1.29 | serpin family E member 1                                    |
| IFIT1     | 1.28 | interferon induced protein with tetratricopeptide repeats 1 |
| SYN2      | 1.28 | synapsin II                                                 |
| (40)IL32  | 1.27 | interleukin 32                                              |
| TIMP4     | 1.27 | TIMP metalloproteinase inhibitor 4                          |
| KIAA1644  | 1.25 | []                                                          |
| PHF24     | 1.23 | PHD finger protein 24                                       |

|           |                                                                           |
|-----------|---------------------------------------------------------------------------|
| MET       | 1.23 MET proto-oncogene, receptor tyrosine kinase                         |
| SRC       | 1.21 SRC proto-oncogene, non-receptor tyrosine kinase                     |
| LOC653513 | 1.19 []                                                                   |
| HR        | 1.18 HR lysine demethylase and nuclear receptor corepressor               |
| CLDN1     | 1.17 claudin 1                                                            |
| FCAR      | 1.17 Fc fragment of IgA receptor                                          |
| IGFN1     | 1.16 immunoglobulin-like and fibronectin type III domain containing 1     |
| TNF       | 1.16 tumor necrosis factor                                                |
| TGFB3     | 1.16 transforming growth factor beta 3                                    |
| TDRD6     | 1.15 tudor domain containing 6                                            |
| LINC00877 | 1.15 long intergenic non-protein coding RNA 877                           |
| SEMA3C    | 1.14 semaphorin 3C                                                        |
| CXCL2     | 1.10 C-X-C motif chemokine ligand 2                                       |
| NCF1      | 1.09 neutrophil cytosolic factor 1                                        |
| MX1       | 1.06 MX dynamin like GTPase 1                                             |
| STC1      | 1.05 stanniocalcin 1                                                      |
| MMP9      | 1.05 matrix metalloproteinase 9                                           |
| TRAF1     | 1.05 TNF receptor associated factor 1                                     |
| RRAD      | 1.05 RRAD, Ras related glycolysis inhibitor and calcium channel regulator |
| SOD2      | 1.04 superoxide dismutase 2                                               |
| LINC01050 | 1.02 long intergenic non-protein coding RNA 1050                          |
| TBX21     | 1.00 T-box 21                                                             |
| CD1D      | -1.03 CD1d molecule                                                       |
| PLK2      | -1.04 polo like kinase 2                                                  |
| TLR7      | -1.04 toll like receptor 7                                                |
| ROBO4     | -1.05 roundabout guidance receptor 4                                      |
| TLR8      | -1.05 toll like receptor 8                                                |
| C2orf91   | -1.08 chromosome 2 open reading frame 91                                  |

|           |       |                                             |
|-----------|-------|---------------------------------------------|
| VCAN      | -1.11 | versican                                    |
| SH3TC2    | -1.13 | SH3 domain and tetratricopeptide repeats 2  |
| MMRN2     | -1.19 | multimerin 2                                |
| PDE7B     | -1.20 | phosphodiesterase 7B                        |
| FCGBP     | -1.22 | Fc fragment of IgG binding protein          |
| HPSE      | -1.24 | heparanase                                  |
| NLRP12    | -1.26 | NLR family pyrin domain containing 12       |
| LINC01537 | -1.31 | long intergenic non-protein coding RNA 1537 |
| BBOX1     | -1.44 | gamma-butyrobetaine hydroxylase 1           |
| NTS       | -1.67 | neurotensin                                 |
| S1PR1     | -1.69 | sphingosine-1-phosphate receptor 1          |
| P2RY12    | -1.88 | purinergic receptor P2Y12                   |

---

Gene expression values are expressed in log<sub>2</sub> fold change.
